# Supplementary material for: Proposal Model for Evaluation of African/Asian/Brazilian-ZIKV Strains Viral Kinetics (Step Growth Curve) in Trophoblastic Cell Lines
Source: Preprints.org preprint supplement (doi:10.20944/preprints202305.1257.v1), 2023-05-17
Supplement: Supplementary file 1 [file supplementary]

## Sheet: Add file 7_Standard curve
Serial dilution	Cт_IEC	Cт_IEC	Cт_IEC	Media_Cт_IEC	Cт_MR766bp	Cт_MR766bp	Cт_MR766bp	Media_Cт_MR766bp
10-1	15.1839	15.3584	15.1006	15.2143	15.475	15.2027	14.8569	15.1782		Datas
10-2	20.8514	21.0273	21.2578	21.0455	19.8957	19.6776	19.9902	19.8545		Second column	Titer value obtained from serial dilution in PFU/mL
10-3	24.1533	23.7593	24.3155	24.076	22.8839	22.876	22.6049	22.7883		Third column	Correction of the title value in relation to the obtained PFU. Multiply by value by the amount in mL of sample used in RNA extraction
10-4	26.4384	25.781	26.7356	26.3184	26.0082	25.9747	26.0925	26.0251		Fourth column	Correction of title value in relation to Extracted PFU. Multiply by value by the amount in mL of sample used in RT-PCR and dilution in mL of extracted RNA
10-5	27.3733	27.9787	28.0188	27.7903	30.0711	30.0524	30.4155	30.1797		Fifth column	Amplified PFU Log10
10-6	27.7928	28.7799	28.575	28.3825	31.5405	31.737	31.334	31.5372		Sixth column	Average of Cт obtained
10-7	28.3205	28.7072	28.4581	28.4953	30.7771	30.7977	30.5761	30.717		Graph	Ratio of the Cт (abscissa) obtained and the Log10 of the titration (ordinate) to obtain the standard curve and the equation of the straight line
10-8	29.4402	29.0668	30.0673	29.5248	30.9525	30.9283	31.1223	31.0011
10-9	29.4785	33.031	29.0258	30.5118	32.4426	32.8754	32.1788	32.4989
10-10	29.9915	29.399	30.1005	29.8303	32	33.3112	31.6086	32.3066
10-11	29.3992	29.3123	29.732	29.4812	32.6133	32.865	32.9111	32.7965
Strain/Replicate (PFU/mL)	First	Second	Third	Average
Tritation IEC	1.30*1E6	1.40*1E6	1.675*1E6	1.4583*1E6 PFU/mL
Tritation MR766bp	1.57*1E8	2.05*1E8	1.425*1E8	1.68167*1E8 PFU/mL
Standard curve calculation
First column	Second column	Third column	Fourth column	Fifth column	Sixth column
Serial dilution IEC	Title value	Extracted PFU	Amplified PFU	Tritation Log10	Average_Cт_IEC
10-1	1450000	362500	36250	4.55931	15.2143
10-2	145000	36250	3625	3.55931	21.0455
10-3	14500	3625	362.5	2.55931	24.076
10-4	1450	362.5	36.25	1.55931	26.3184
10-5	145	36.25	3.625	0.559308	27.7903
10-6	14.5	3.625	0.3625	-0.440692	28.3825
10-7	1.45	0.3625	0.03625	-1.44069	28.4953
10-8	0.145	0.03625	0.003625	-2.44069	29.5248
10-9	0.0145	0.003625	0.0003625	-3.44069	30.5118
10-10	0.00145	0.0003625	3.625e-05	-4.44069	29.8303
10-11	0.000145	3.625e-05	3.625e-06	-5.44069	29.4812
Serial dilution MR766bp	Title value	Extracted PFU	Amplified PFU	Tritation Log10	Average_Cт_IEC
10-1	168000000	42000000	4200000	6.62325	15.1782
10-2	16800000	4200000	420000	5.62325	19.8545
10-3	1680000	420000	42000	4.62325	22.7883
10-4	168000	42000	4200	3.62325	26.0251
10-5	16800	4200	420	2.62325	30.1797
10-6	1680	420	42	1.62325	31.5372
10-7	168	42	4.2	0.623249	30.717
10-8	16.8	4.2	0.42	-0.376751	31.0011
10-9	1.68	0.42	0.042	-1.37675	32.4989
10-10	0.168	0.042	0.0042	-2.37675	32.3066
10-11	0.0168	0.0042	0.00042	-3.37675	32.7965

## Sheet: Add file 8_Knetcs_IEC
		Cт_2h	Cт_24h	Cт_48h	Cт_72h	Cт_96h	Cт_120h	Cт_144h
SH-SY5Y/IEC	Supernatant	27.6285	24.9696	19.9827	15.4844	15.4286	14.8351	14.1627
	Cells	21.8704	22.7655	20.3942	16.7959	17.5031	25.5742	32.5155
	Mock	NDA	NDA	NDA	NDA	NDA	NDA	NDA
Huh-7/IEC	Supernatant	20.2152	19.1876	16.4494	16.6461	15.3634	16.1733	15.6427
	Cells	22.015	18.0611	16.1171	16.5199	18.9061	22.0279	23.4722
	Mock	Undetermined	Undetermined	Undetermined	39.2855	Undetermined	Undetermined	Undetermined
C+/IEC (10ˆ-1)	17.5882
MIX-rtPCR	Undetermined
H2O DEPC	Undetermined
		Cт_2h	Cт_24h	Cт_48h	Cт_72h	Cт_96h	Cт_120h	Cт_144h
BeWo/IEC	Supernatant	26.261	23.451	20.6408	20.1189	18.8891	18.9267	14.8923
	Cells	19.3637	18.7329	16.8416	17.4317	17.1314	17.0368	17.7326
	Mock	NDA	NDA	34.5799	NDA	NDA	NDA	NDA
BeWo+Forskolin/IEC	Supernatant	18.8295	18.8007	17.8782	18.5212	18.1867	19.5268	19.2914
	Cells	19.9287	15.3629	14.3852	16.4589	19.7123	18.296	18.6521
	Mock	33.4064	NDA	NDA	NDA	NDA	NDA	NDA
HTR-8/IEC	Supernatant	25.7079	24.7862	23.189	22.9225	22.7155	17.583	20.3734
	Cells	19.0769	17.9117	17.7362	17.7042	17.5609	21.2314	18.9194
	Mock	34.0569	NDA	NDA	NDA	NDA	NDA	NDA
C+/IEC (10ˆ-1)	16.9745
MIX-rtPCR	Undetermined
H2O DEPC	Undetermined
Equation of a line	y = -0,3058x + 9,5588
								Graph
SH-SY5Y/IEC	Cт	Log10 PFU	anti-log10 PFU	PFU/250 mL	PFU/mL	Log10 PFU/mL	Time-point	Extracellular	Intracellular
2h	27.6285	1.11001	12.8828	128.828	515.313	2.71207	2h	515.313	29708.7
	21.8704	2.87082	742.719	7427.19	29708.7	4.47288	24h	3350.81	15818.6
24h	24.9696	1.92309	83.7702	837.702	3350.81	3.52515	48h	112242	84007.7
	22.7655	2.59711	395.464	3954.64	15818.6	4.19917	72h	2.66513e+06	1.05845e+06
48h	19.9827	3.44809	2806.04	28060.4	112242	5.05015	96h	2.77204e+06	643300
	20.3942	3.32226	2100.19	21001.9	84007.7	4.92432	120h	4.20995e+06	2189.19
72h	15.4844	4.82366	66628.1	666281	2.66513e+06	6.42572	144h	6.75925e+06	16.5057
	16.7959	4.42261	26461.2	264612	1.05845e+06	6.02467
96h	15.4286	4.84074	69301	693010	2.77204e+06	6.4428
	17.5031	4.20635	16082.5	160825	643300	5.80841
120h	14.8351	5.02222	105249	1.05249e+06	4.20995e+06	6.62428
	25.5742	1.73822	54.7298	547.298	2189.19	3.34028
144h	14.1627	5.22784	168981	1.68981e+06	6.75925e+06	6.8299
	32.5155	-0.384426	0.412643	4.12643	16.5057	1.21763
Huh-7/IEC
2h	20.2152	3.377	2382.33	23823.3	95293.1	4.97906	Time-point	Extracellular	Intracellular
	22.015	2.8266	670.815	6708.15	26832.6	4.42866	2h	95293.1	26832.6
24h	19.1876	3.69124	4911.82	49118.2	196473	5.2933	24h	196473	434274
	18.0611	4.0357	10856.8	108568	434274	5.63776	48h	1.35091e+06	1.70705e+06
48h	16.4494	4.52857	33772.8	337728	1.35091e+06	6.13063	72h	1.17622e+06	1.28547e+06
	16.1171	4.63019	42676.1	426761	1.70705e+06	6.23225	96h	2.90217e+06	239541
72h	16.6461	4.46843	29405.4	294054	1.17622e+06	6.07049	120h	1.64088e+06	26590.2
	16.5199	4.507	32136.7	321367	1.28547e+06	6.10906	144h	2.3841e+06	9617.27
96h	15.3634	4.86066	72554.3	725543	2.90217e+06	6.46272
	18.9061	3.77732	5988.54	59885.4	239541	5.37938
120h	16.1733	4.61302	41021.9	410219	1.64088e+06	6.21508
	22.0279	2.82266	664.755	6647.55	26590.2	4.42472
144h	15.6427	4.77526	59602.4	596024	2.3841e+06	6.37732
	23.4722	2.38099	240.432	2404.32	9617.27	3.98305
BeWo/IEC
2h	26.261	1.52819	33.7433	337.433	1349.73	3.13025	Time-point	Extracellular	Intracellular
	19.3637	3.63737	4338.82	43388.2	173553	5.23943	2h	1349.73	173553
24h	23.451	2.38748	244.05	2440.5	9762	3.98954	24h	9762	270601
	18.7329	3.83027	6765.02	67650.2	270601	5.43233	48h	70616.9	1.02494e+06
48h	20.6408	3.24685	1765.42	17654.2	70616.9	4.84891	72h	101978	676473
	16.8416	4.40864	25623.6	256236	1.02494e+06	6.0107	96h	242416	835779
72h	20.1189	3.40644	2549.44	25494.4	101978	5.0085	120h	236086	893319
	17.4317	4.22819	16911.8	169118	676473	5.83025	144h	4.04377e+06	547303
96h	18.8891	3.7825	6060.4	60604	242416	5.38456
	17.1314	4.32003	20894.5	208945	835779	5.92209
120h	18.9267	3.77101	5902.16	59021.6	236086	5.37307
	17.0368	4.34895	22333	223330	893319	5.95101
144h	14.8923	5.00473	101094	1.01094e+06	4.04377e+06	6.60679
	17.7326	4.13617	13682.6	136826	547303	5.73823
HTR-8/IEC
2h	25.7079	1.69734	49.8122	498.122	1992.49	3.2994	Time-point	Extracellular	Intracellular
	19.0769	3.72507	5309.76	53097.6	212390	5.32713	2h	1992.49	212390
24h	24.7862	1.97917	95.318	953.18	3812.72	3.58123	24h	3812.72	482447
	17.9117	4.08139	12061.2	120612	482447	5.68345	48h	11740	545929
48h	23.189	2.46761	293.499	2934.99	11740	4.06967	72h	14163.1	558379
	17.7362	4.13508	13648.2	136482	545929	5.73714	96h	16385.5	617635
72h	22.9225	2.5491	354.077	3540.77	14163.1	4.15116	120h	608119	46589.5
	17.7042	4.14487	13959.5	139595	558379	5.74693	144h	85248	237311
96h	22.7155	2.6124	409.637	4096.37	16385.5	4.21446
	17.5609	4.18867	15440.9	154409	617635	5.79073
120h	17.583	4.18193	15203	152030	608119	5.78399
	21.2314	3.06623	1164.74	11647.4	46589.5	4.66829
144h	20.3734	3.32862	2131.2	21312	85248	4.93068
	18.9194	3.77326	5932.76	59327.6	237311	5.37532
BeWo+Forskolin/IEC
2h	18.8295	3.80072	6320.11	63201.1	252805	5.40278	Time-point	Extracellular	Intracellular
	19.9287	3.4646	2914.77	29147.7	116591	5.06666	2h	252805	116591
24h	18.8007	3.80956	6449.94	64499.4	257998	5.41162	24h	257998	2.90329e+06
	15.3629	4.86083	72582.3	725823	2.90329e+06	6.46289	48h	493985	5.77917e+06
48h	17.8782	4.09165	12349.6	123496	493985	5.69371	72h	314107	1.34193e+06
	14.3852	5.15981	144479	1.44479e+06	5.77917e+06	6.76187	96h	397522	135779
72h	18.5212	3.89502	7852.68	78526.8	314107	5.49708	120h	154724	368080
	16.4589	4.52567	33548.3	335483	1.34193e+06	6.12773	144h	182625	286453
96h	18.1867	3.9973	9938.06	99380.6	397522	5.59936
	19.7123	3.53077	3394.49	33944.9	135779	5.13283
120h	19.5268	3.5875	3868.09	38680.9	154724	5.18956
	18.296	3.96388	9202.01	92020.1	368080	5.56594
144h	19.2914	3.6595	4565.64	45656.4	182625	5.26156
	18.6521	3.85499	7161.32	71613.2	286453	5.45705

## Sheet: Add file 8_Knetcs_MR766bp
		Cт_2h	Cт_24h	Cт_48h	Cт_72h	Cт_96h	Cт_120h	Cт_144h
HuH-7/MR766bp	Supernatant	18.2047	18.6652	15.7649	16.0605	15.4528	16.5978	16.1867
	Cells	22.0125	18.1929	18.0696	19.5477	22.0235	23.0463	24.2811
	Mock	Undetermined	Undetermined	Undetermined	21.0539	Undetermined	Undetermined	19.0122
BeWo/MR766bp	Supernatant	18.4135	16.5723	15.1329	16.171	15.798	16.6829	16.5431
	Cells	18.2912	13.6529	15.9799	21.2537	23.9836	26.3541	30.0492
	Mock	Undetermined	Undetermined	Undetermined	Undetermined	Undetermined	Undetermined	Undetermined
BeWo+Forskolin/MR766bp	Supernatant	18.0094	16.2624	15.8316	14.9183	14.7561	15.8598	15.4037
	Cells	18.9466	13.7253	15.4421	19.8913	21.9383	23.1077	27.0891
	Mock	27.6255	28.6504	Undetermined	27.3323	Undetermined	Undetermined	Undetermined
HTR-8/MR766bp	Supernatant	18.4136	17.2753	17.9831	18.0174	16.8308	17.5832	17.8631
	Cells	18.4819	14.5099	14.9207	19.2336	23.0268	27.6543	29.3173
	Mock	Undetermined	Undetermined	Undetermined	Undetermined	Undetermined	Undetermined	35.0213
C+/IEC (10ˆ-1)	Undetermined
MIX-rtPCR	36.807
H2O DEPC	Undetermined
Equation of a line	y = -0,2972x + 11,333							Graph
							Time-point	Extracellular	Intracellular
HuH-7/MR766bp	Cт	PFU Log10	PFU anti-Log10	PFU/50microL	PFU/mL	Log10 PFU/mL	2h	3.3468e+07	2.47142e+06
2h	18.2047	5.92257	836701	8.36701e+06	3.3468e+07	7.52463	24h	2.44202e+07	3.37388e+07
	22.0125	4.79089	61785.5	617855	2.47142e+06	6.39295	48h	1.77722e+08	3.67088e+07
24h	18.6652	5.78569	610505	6.10505e+06	2.44202e+07	7.38775	72h	1.45168e+08	1.33501e+07
	18.1929	5.92607	843470	8.4347e+06	3.37388e+07	7.52813	96h	2.20038e+08	2.45283e+06
48h	15.7649	6.64768	4.44306e+06	4.44306e+07	1.77722e+08	8.24974	120h	1.00509e+08	1.21814e+06
	18.0696	5.96271	917720	9.1772e+06	3.67088e+07	7.56477	144h	1.33162e+08	523254
72h	16.0605	6.55981	3.6292e+06	3.6292e+07	1.45168e+08	8.16187
	19.5477	5.52342	333752	3.33752e+06	1.33501e+07	7.12548
96h	15.4528	6.74044	5.50096e+06	5.50096e+07	2.20038e+08	8.3425
	22.0235	4.78761	61320.7	613207	2.45283e+06	6.38967
120h	16.5978	6.40015	2.51273e+06	2.51273e+07	1.00509e+08	8.00221
	23.0463	4.48364	30453.5	304535	1.21814e+06	6.0857
144h	16.1867	6.52232	3.32906e+06	3.32906e+07	1.33162e+08	8.12438
	24.2811	4.11665	13081.4	130814	523254	5.71871
BeWo/MR766bp							Time-point	Extracellular	Intracellular
2h	18.4135	5.86051	725295	7.25295e+06	2.90118e+07	7.46257	2h	2.90118e+07	3.15437e+07
	18.2912	5.89685	788593	7.88593e+06	3.15437e+07	7.49891	24h	1.02275e+08	7.54074e+08
24h	16.5723	6.40771	2.55688e+06	2.55688e+07	1.02275e+08	8.00977	48h	2.73873e+08	1.53406e+08
	13.6529	7.27535	1.88519e+07	1.88519e+08	7.54074e+08	8.87741	72h	1.34602e+08	4.15398e+06
48h	15.1329	6.83549	6.84682e+06	6.84682e+07	2.73873e+08	8.43755	96h	1.73736e+08	641422
	15.9799	6.58378	3.83516e+06	3.83516e+07	1.53406e+08	8.18584	120h	9.48208e+07	126656
72h	16.171	6.52699	3.36505e+06	3.36505e+07	1.34602e+08	8.12905	144h	1.04342e+08	10102.7
	21.2537	5.0164	103849	1.03849e+06	4.15398e+06	6.61846
96h	15.798	6.63783	4.3434e+06	4.3434e+07	1.73736e+08	8.23989
	23.9836	4.20508	16035.6	160356	641422	5.80714
120h	16.6829	6.37484	2.37052e+06	2.37052e+07	9.48208e+07	7.9769
	26.3541	3.50057	3166.41	31664.1	126656	5.10263
144h	16.5431	6.4164	2.60854e+06	2.60854e+07	1.04342e+08	8.01846
	30.0492	2.40238	252.567	2525.67	10102.7	4.00444
BeWo+Forskolin/MR766bp							Time-point	Extracellular	Intracellular
2h	18.0094	5.9806	956312	9.56312e+06	3.82525e+07	7.58266	2h	3.82525e+07	2.01439e+07
	18.9466	5.70208	503597	5.03597e+06	2.01439e+07	7.30414	24h	1.26437e+08	7.17636e+08
24h	16.2624	6.49981	3.16092e+06	3.16092e+07	1.26437e+08	8.10187	48h	1.69793e+08	2.21652e+08
	13.7253	7.25384	1.79409e+07	1.79409e+08	7.17636e+08	8.8559	72h	3.17204e+08	1.05525e+07
48h	15.8316	6.62786	4.24482e+06	4.24482e+07	1.69793e+08	8.22992	96h	3.54437e+08	2.60018e+06
	15.4421	6.74361	5.54131e+06	5.54131e+07	2.21652e+08	8.34567	120h	1.66548e+08	1.16804e+06
72h	14.9183	6.89928	7.93011e+06	7.93011e+07	3.17204e+08	8.50134	144h	2.27544e+08	76592.5
	19.8913	5.42129	263812	2.63812e+06	1.05525e+07	7.02335
96h	14.7561	6.94748	8.86093e+06	8.86093e+07	3.54437e+08	8.54954
	21.9383	4.81294	65004.5	650045	2.60018e+06	6.415
120h	15.8598	6.61948	4.1637e+06	4.1637e+07	1.66548e+08	8.22154
	23.1077	4.4654	29200.9	292009	1.16804e+06	6.06746
144h	15.4037	6.75501	5.6886e+06	5.6886e+07	2.27544e+08	8.35707
	27.0891	3.28213	1914.81	19148.1	76592.5	4.88419
HTR-8/MR766bp							Time-point	Extracellular	Intracellular
2h	18.4136	5.86047	725219	7.25219e+06	2.90088e+07	7.46253	2h	2.90088e+07	2.76847e+07
	18.4819	5.84018	692117	6.92117e+06	2.76847e+07	7.44224	24h	6.32185e+07	4.19495e+08
24h	17.2753	6.19878	1.58046e+06	1.58046e+07	6.32185e+07	7.80084	48h	3.89467e+07	3.16688e+08
	14.5099	7.02067	1.04874e+07	1.04874e+08	4.19495e+08	8.62273	72h	3.8045e+07	1.65513e+07
48h	17.9831	5.98841	973668	9.73668e+06	3.89467e+07	7.59047	96h	8.56943e+07	1.23452e+06
	14.9207	6.89857	7.91719e+06	7.91719e+07	3.16688e+08	8.50063	120h	5.12065e+07	52023
72h	18.0174	5.97824	951125	9.51125e+06	3.8045e+07	7.5803	144h	4.22809e+07	16670.4
	19.2336	5.61677	413782	4.13782e+06	1.65513e+07	7.21883
96h	16.8308	6.33089	2.14236e+06	2.14236e+07	8.56943e+07	7.93295
	23.0268	4.48944	30863	308630	1.23452e+06	6.0915
120h	17.5832	6.10727	1.28016e+06	1.28016e+07	5.12065e+07	7.70933
	27.6543	3.11414	1300.57	13005.7	52023	4.7162
144h	17.8631	6.02408	1.05702e+06	1.05702e+07	4.22809e+07	7.62614
	29.3173	2.61989	416.76	4167.6	16670.4	4.22195

## Sheet: Add file 8_2nd_Knetics_MR766bp
		Cт_24h	Cт_48h	Cт_72h
HuH-7/MR766bp	Supernatant	18.5847	13.474	12.9128
	Cells	14.7323	20.4419	12.3974
	Mock	28.0358	27.3759	26.9449
BeWo+Forskolin/MR766bp	Supernatant	18.9798	13.3692	11.7028
	Cells	14.9323	11.9696	12.8138
	Mock	27.4684	26.7027	27.2019
BeWo/MR766bp	Supernatant	19.6615	12.79	11.4774
	Cells	13.2968	11.4119	11.1342
	Mock	26.6429	26.5097	27.4338
HTR-8/MR766bp	Supernatant	26.7668	23.264	16.958
	Cells	20.3754	17.4349	14.94
	Mock	27.9787	27.329	27.2188
C+/IEC (10ˆ-1)
MIX-rtPCR
H2O DEPC
Equation of a line	y = (-0,2972*x) + 11,333
									Graph PFU/mL
HuH-7/MR766bp	Cт	PFU Log10	PFU anti-Log10	PFU/50microL	PFU/mL	Log10 PFU/mL	PFU/mL		Time-point	Extracellular	Intracellular
24h(ex)	18.5847	5.80962	645094	6.45094e+06	2.58037e+07	7.41168	2.58037e+07		24h	2.58037e+07	3.60259e+08
24h(in)	14.7323	6.95455	9.00646e+06	9.00646e+07	3.60259e+08	8.55661	3.60259e+08		48h	8.52271e+08	7.23971e+06
48h(ex)	13.474	7.32852	2.13068e+07	2.13068e+08	8.52271e+08	8.93058	8.52271e+08		72h	1.25137e+09	1.7806e+09
48h(in)	20.4419	5.25766	180993	1.80993e+06	7.23971e+06	6.85972	7.23971e+06
72h(ex)	12.9128	7.49533	3.12843e+07	3.12843e+08	1.25137e+09	9.09739	1.25137e+09
72h(in)	12.3974	7.64851	4.45149e+07	4.45149e+08	1.7806e+09	9.25057	1.7806e+09
BeWo+Forskolin/MR766bp
24h(ex)	18.9798	5.69221	492277	4.92277e+06	1.96911e+07	7.29427	1.96911e+07		Time-point	Extracellular	Intracellular
24h(in)	14.9323	6.89512	7.85451e+06	7.85451e+07	3.1418e+08	8.49718	3.1418e+08		24h	1.96911e+07	3.1418e+08
48h(ex)	13.3692	7.35967	2.28911e+07	2.28911e+08	9.15645e+08	8.96173	9.15645e+08		48h	9.15645e+08	2.38618e+09
48h(in)	11.9696	7.77564	5.96545e+07	5.96545e+08	2.38618e+09	9.3777	2.38618e+09		72h	2.86404e+09	1.33901e+09
72h(ex)	11.7028	7.85492	7.1601e+07	7.1601e+08	2.86404e+09	9.45698	2.86404e+09
72h(in)	12.8138	7.52472	3.34753e+07	3.34753e+08	1.33901e+09	9.12678	1.33901e+09
BeWo/MR766bp
24h(ex)	19.6615	5.4896	308747	3.08747e+06	1.23499e+07	7.09166	1.23499e+07		Time-point	Extracellular	Intracellular
24h(in)	13.2968	7.3812	2.40545e+07	2.40545e+08	9.62181e+08	8.98326	9.62181e+08		24h	1.23499e+07	9.62181e+08
48h(ex)	12.79	7.53183	3.40271e+07	3.40271e+08	1.36108e+09	9.13389	1.36108e+09		48h	1.36108e+09	3.49508e+09
48h(in)	11.4119	7.9414	8.73769e+07	8.73769e+08	3.49508e+09	9.54346	3.49508e+09		72h	3.34169e+09	4.22649e+09
72h(ex)	11.4774	7.92191	8.35422e+07	8.35422e+08	3.34169e+09	9.52397	3.34169e+09
72h(in)	11.1342	8.02392	1.05662e+08	1.05662e+09	4.22649e+09	9.62598	4.22649e+09
HTR-8/MR766bp
24h(ex)	26.7668	3.37792	2387.37	23873.7	95494.8	4.97998	95494.8		Time-point	Extracellular	Intracellular
24h(in)	20.3754	5.27743	189422	1.89422e+06	7.57689e+06	6.87949	7.57689e+06		24h	95494.8	7.57689e+06
48h(ex)	23.264	4.41892	26237.6	262376	1.0495e+06	6.02098	1.0495e+06		48h	1.0495e+06	5.6677e+07
48h(in)	17.4349	6.15135	1.41693e+06	1.41693e+07	5.6677e+07	7.75341	5.6677e+07		72h	7.85497e+07	3.12539e+08
72h(ex)	16.958	6.29308	1.96374e+06	1.96374e+07	7.85497e+07	7.89514	7.85497e+07
72h(in)	14.94	6.89284	7.81348e+06	7.81348e+07	3.12539e+08	8.4949	3.12539e+08

## Sheet: Add file 8_2nd_Knetics_IEC
		Cт_24h	Cт_48h	Cт_72h
HuH-7/IEC	Supernatant	19.155	17.0087	13.2743
	Cells	11.5281	9.44658	11.3009
	Mock	28.0358	27.3759	26.9449
BeWo/IEC	Supernatant	20.2864	18.9226	17.2326
	Cells	12.6397	14.1573	13.9307
	Mock	26.6429	26.5097	27.4338
BeWo+Forskolin/IEC	Supernatant	20.2995	19.138	17.321
	Cells	15.6409	15.0195	15.8421
	Mock	27.4684	26.7027	27.2019
HTR-8/IEC	Supernatant	20.4066	19.9702	20.0666
	Cells	12.9935	12.9247	12.483
	Mock	27.9787	27.329	27.2188
C+/IEC (10ˆ-1)
MIX-rtPCR
H2O DEPC
Equation of a line	y = (-0,3058*x) + 9,5588
									Graph PFU/mL
HuH-7/IEC	Cт	PFU Log10	PFU anti-Log10	PFU/50microL	PFU/mL	Log10 PFU/mL	PFU/mL		Time-point	Extracellular	Intracellular
24h(ex)	19.155	3.7012	5025.69	50256.9	201028	5.30326	201028		24h	201028	4.3208e+07
24h(in)	11.5281	6.0335	1.0802e+06	1.0802e+07	4.3208e+07	7.63556	4.3208e+07		48h	911173	1.87109e+08
48h(ex)	17.0087	4.35754	22779.3	227793	911173	5.9596	911173		72h	1.26349e+07	5.07055e+07
48h(in)	9.44658	6.67003	4.67772e+06	4.67772e+07	1.87109e+08	8.27209	1.87109e+08
72h(ex)	13.2743	5.49951	315872	3.15872e+06	1.26349e+07	7.10157	1.26349e+07
72h(in)	11.3009	6.103	1.26764e+06	1.26764e+07	5.07055e+07	7.70506	5.07055e+07
BeWo+Forskolin/IEC
24h(ex)	20.2995	3.35121	2244.99	22449.9	89799.6	4.95327	89799.6		Time-point	Extracellular	Intracellular
24h(in)	15.6409	4.77581	59677.2	596772	2.38709e+06	6.37787	2.38709e+06		24h	89799.6	2.38709e+06
48h(ex)	19.138	3.70641	5086.41	50864.1	203456	5.30847	203456		48h	203456	3.69748e+06
48h(in)	15.0195	4.96585	92437	924370	3.69748e+06	6.56791	3.69748e+06		72h	731324	2.07186e+06
72h(ex)	17.321	4.26205	18283.1	182831	731324	5.86411	731324
72h(in)	15.8421	4.7143	51796.4	517964	2.07186e+06	6.31636	2.07186e+06
BeWo/IEC
24h(ex)	20.2864	3.35522	2265.81	22658.1	90632.5	4.95728	90632.5		Time-point	Extracellular	Intracellular
24h(in)	12.6397	5.69357	493826	4.93826e+06	1.97531e+07	7.29563	1.97531e+07		24h	90632.5	1.97531e+07
48h(ex)	18.9226	3.77226	5919.15	59191.5	236766	5.37432	236766		48h	236766	6.78508e+06
48h(in)	14.1573	5.22949	169627	1.69627e+06	6.78508e+06	6.83155	6.78508e+06		72h	778258	7.95895e+06
72h(ex)	17.2326	4.28906	19456.4	194564	778258	5.89112	778258
72h(in)	13.9307	5.2988	198974	1.98974e+06	7.95895e+06	6.90086	7.95895e+06
HTR-8/IEC
24h(ex)	20.4066	3.31845	2081.85	20818.5	83273.8	4.92051	83273.8		Time-point	Extracellular	Intracellular
24h(in)	12.9935	5.58537	384922	3.84922e+06	1.53969e+07	7.18743	1.53969e+07		24h	83273.8	1.53969e+07
48h(ex)	19.9702	3.45192	2830.88	28308.8	113235	5.05398	113235		48h	113235	1.61619e+07
48h(in)	12.9247	5.60643	404048	4.04048e+06	1.61619e+07	7.20849	1.61619e+07		72h	105800	2.20569e+07
72h(ex)	20.0666	3.42243	2645.01	26450.1	105800	5.02449	105800
72h(in)	12.483	5.74148	551422	5.51422e+06	2.20569e+07	7.34354	2.20569e+07

## Sheet: Add file 8_3rd_Knetics_MR766bp
		Cт_24h	Cт_48h	Cт_72h
HuH-7/MR766bp	Supernatant	15.7531	11.3189	13.8946
	Cells	11.749	15.2984	17.9837
	Mock	29.4254	29.0413	28.7055
BeWo/MR766bp	Supernatant	16.0467	14.1859	11.5424
	Cells	12.4254	13.2699	11.8709
	Mock	28.7171	29.0905	28.8001
BeWo+Forskolin/MR766bp	Supernatant	16.9145	15.226	12.2165
	Cells	13.8565	12.6033	10.5767
	Mock	28.8522	28.8354	28.845
HTR-8/MR766bp	Supernatant	21.1752	15.6052	14.3511
	Cells	16.1187	12.4152	13.7882
	Mock	27.6097	28.6046	27.2451
C+/IEC (10ˆ-1)
MIX-rtPCR
H2O DEPC
Equation of a line	y = (-0,2972*x) + 11,333
									Graph PFU/mL
HuH-7/MR766bp	Cт	PFU Log10	PFU anti-Log10	PFU/50microL	PFU/mL	Log10 PFU/mL	PFU/mL		Time-point	Extracellular	Intracellular
24h(ex)	15.7531	6.65117	4.47891e+06	4.47891e+07	1.79156e+08	8.25323	1.79156e+08		24h	1.79156e+08	2.77488e+09
24h(in)	11.749	7.84118	6.93719e+07	6.93719e+08	2.77488e+09	9.44324	2.77488e+09		48h	3.72452e+09	2.44551e+08
48h(ex)	11.3189	7.96901	9.31129e+07	9.31129e+08	3.72452e+09	9.57107	3.72452e+09		72h	6.39118e+08	3.89308e+07
48h(in)	15.2984	6.78631	6.11377e+06	6.11377e+07	2.44551e+08	8.38837	2.44551e+08
72h(ex)	13.8946	7.20352	1.5978e+07	1.5978e+08	6.39118e+08	8.80558	6.39118e+08
72h(in)	17.9837	5.98823	973271	9.73271e+06	3.89308e+07	7.59029	3.89308e+07
BeWo+Forskolin/MR766bp
24h(ex)	16.9145	6.30601	2.02306e+06	2.02306e+07	8.09223e+07	7.90807	8.09223e+07		Time-point	Extracellular	Intracellular
24h(in)	13.8565	7.21484	1.63999e+07	1.63999e+08	6.55997e+08	8.8169	6.55997e+08		24h	8.09223e+07	6.55997e+08
48h(ex)	15.226	6.80784	6.42445e+06	6.42445e+07	2.56978e+08	8.4099	2.56978e+08		48h	2.56978e+08	1.54658e+09
48h(in)	12.6033	7.58731	3.86645e+07	3.86645e+08	1.54658e+09	9.18937	1.54658e+09		72h	2.01514e+09	6.18944e+09
72h(ex)	12.2165	7.70225	5.03785e+07	5.03785e+08	2.01514e+09	9.30431	2.01514e+09
72h(in)	10.5767	8.18959	1.54736e+08	1.54736e+09	6.18944e+09	9.79165	6.18944e+09
BeWo/MR766bp
24h(ex)	16.0467	6.56393	3.66377e+06	3.66377e+07	1.46551e+08	8.16599	1.46551e+08		Time-point	Extracellular	Intracellular
24h(in)	12.4254	7.64016	4.36682e+07	4.36682e+08	1.74673e+09	9.24222	1.74673e+09		24h	1.46551e+08	1.74673e+09
48h(ex)	14.1859	7.11695	1.30903e+07	1.30903e+08	5.23612e+08	8.71901	5.23612e+08		48h	5.23612e+08	9.80026e+08
48h(in)	13.2699	7.38918	2.45007e+07	2.45007e+08	9.80026e+08	8.99124	9.80026e+08		72h	3.19629e+09	2.55294e+09
72h(ex)	11.5424	7.90259	7.99073e+07	7.99073e+08	3.19629e+09	9.50465	3.19629e+09
72h(in)	11.8709	7.80498	6.38236e+07	6.38236e+08	2.55294e+09	9.40704	2.55294e+09
HTR-8/MR766bp
24h(ex)	21.1752	5.03974	109582	1.09582e+06	4.38326e+06	6.03974	4.38326e+06		Time-point	Extracellular	Intracellular
24h(in)	16.1187	6.54252	3.48753e+06	3.48753e+07	1.39501e+08	7.54252	1.39501e+08		24h	4.38326e+06	1.39501e+08
48h(ex)	15.6052	6.69514	4.95613e+06	4.95613e+07	1.98245e+08	7.69514	1.98245e+08		48h	1.98245e+08	1.75899e+09
48h(in)	12.4152	7.6432	4.39747e+07	4.39747e+08	1.75899e+09	8.6432	1.75899e+09		72h	4.67641e+08	6.87378e+08
72h(ex)	14.3511	7.06785	1.1691e+07	1.1691e+08	4.67641e+08	8.06785	4.67641e+08
72h(in)	13.7882	7.23514	1.71844e+07	1.71844e+08	6.87378e+08	8.23514	6.87378e+08

## Sheet: Add file 8_3rd_Knetics_IEC
		Cт_24h	Cт_48h	Cт_72h
HuH-7/MR766bp	Supernatant	18.427	15.9089	14.6527
	Cells	13.2423	11.3148	11.4773
	Mock	29.4254	29.0413	28.7055
BeWo/MR766bp	Supernatant	17.4352	19.1613	16.3011
	Cells	12.8541	14.1546	14.4342
	Mock	28.7171	29.0905	28.8001
BeWo+Forskolin/MR766bp	Supernatant	18.1931	17.0062	17.019
	Cells	11.9109	13.2653	13.1424
	Mock	28.8522	28.8354	28.845
HTR-8/MR766bp	Supernatant	21.4856	20.3138	18.5712
	Cells	15.2519	15.4676	13.8981
	Mock	27.6097	28.6046	27.2451
C+/IEC (10ˆ-1)
MIX-rtPCR
H2O DEPC
Equation of a line	y=(-0,3058*x) + 9,5588
									Graph PFU/mL
HuH-7/IEC	Cт	PFU Log10	PFU anti-Log10	PFU/50microL	PFU/mL	Log10 PFU/mL	PFU/mL		Time-point	Extracellular	Intracellular
24h(ex)	18.427	3.92381	8390.92	83909.2	335637	5.52587	335637		24h	335637	1.29231e+07
24h(in)	13.2423	5.50931	323078	3.23078e+06	1.29231e+07	7.11137	1.29231e+07		48h	1.97654e+06	5.0212e+07
48h(ex)	15.9089	4.69385	49413.5	494135	1.97654e+06	6.29591	1.97654e+06		72h	4.78713e+06	4.47806e+07
48h(in)	11.3148	6.09875	1.2553e+06	1.2553e+07	5.0212e+07	7.70081	5.0212e+07
72h(ex)	14.6527	5.07802	119678	1.19678e+06	4.78713e+06	6.68008	4.78713e+06
72h(in)	11.4773	6.04903	1.11951e+06	1.11951e+07	4.47806e+07	7.65109	4.47806e+07
BeWo+Forskolin/IEC
24h(ex)	18.1931	3.99535	9893.41	98934.1	395736	5.59741	395736		Time-point	Extracellular	Intracellular
24h(in)	11.9109	5.91645	825001	8.25001e+06	3.30001e+07	7.51851	3.30001e+07		24h	395736	3.30001e+07
48h(ex)	17.0062	4.35831	22819.6	228196	912782	5.96037	912782		48h	912782	1.27159e+07
48h(in)	13.2653	5.50229	317896	3.17896e+06	1.27159e+07	7.10435	1.27159e+07		72h	904603	1.38649e+07
72h(ex)	17.019	4.3544	22615.1	226151	904603	5.95646	904603
72h(in)	13.1424	5.53986	346623	3.46623e+06	1.38649e+07	7.14192	1.38649e+07
BeWo/IEC
24h(ex)	17.4352	4.22712	16870.3	168703	674810	5.82918	674810		Time-point	Extracellular	Intracellular
24h(in)	12.8541	5.62802	424642	4.24642e+06	1.69857e+07	7.23008	1.69857e+07		24h	674810	1.69857e+07
48h(ex)	19.1613	3.69929	5003.65	50036.5	200146	5.30135	200146		48h	200146	6.79783e+06
48h(in)	14.1546	5.23031	169946	1.69946e+06	6.79783e+06	6.83237	6.79783e+06		72h	1.49964e+06	5.58322e+06
72h(ex)	16.3011	4.57393	37491.1	374911	1.49964e+06	6.17599	1.49964e+06
72h(in)	14.4342	5.14482	139581	1.39581e+06	5.58322e+06	6.74688	5.58322e+06
HTR-8/IEC
24h(ex)	21.4856	2.98851	973.888	9738.88	38955.5	4.59057	38955.5		Time-point	Extracellular	Intracellular
24h(in)	15.2519	4.89475	78479.2	784792	3.13917e+06	6.49681	3.13917e+06		24h	38955.5	3.13917e+06
48h(ex)	20.3138	3.34685	2222.53	22225.3	88901	4.94891	88901		48h	88901	2.69689e+06
48h(in)	15.4676	4.8288	67422.3	674223	2.69689e+06	6.43086	2.69689e+06		72h	303239	8.14378e+06
72h(ex)	18.5712	3.87973	7580.98	75809.8	303239	5.48179	303239
72h(in)	13.8981	5.30877	203595	2.03595e+06	8.14378e+06	6.91083	8.14378e+06

## Sheet: Resume_Tables_Graph_IEC_MR766bp
MR766lp
BeWo					BeWo fork					HTR-8					HuH-7									Time-point	BeWo_MR766lp	BeWofork_MR766lp	HTR-8_MR766lp	HuH-7_MR766lp	BeWo_IEC	BeWofork_IEC	HTR-8_IEC	HuH-7_IEC
Time-point	Intracellular	Extracellular	Total	Relation	Time-point	Intracellular	Extracellular	Total	Relation	Time-point	Intracellular	Extracellular	Total	Relation	Time-point	Intracellular	Extracellular	Total	Relation					2h	0.919733	1.89896	1.04783	13.542	0.00777708	2.1683	0.00938127	3.55139
2h	3.15437e+07	2.90118e+07	6.05555e+07	0.919733	2h	2.01439e+07	3.82525e+07	5.83964e+07	1.89896	2h	2.76847e+07	2.90088e+07	5.66935e+07	1.04783	2h	2.47142e+06	3.3468e+07	3.59395e+07	13.542					24h	0.13563	0.176185	0.150702	0.723802	0.0360753	0.0888638	0.00790288	0.452417
24h	7.54074e+08	1.02275e+08	8.5635e+08	0.13563	24h	7.17636e+08	1.26437e+08	8.44072e+08	0.176185	24h	4.19495e+08	6.32185e+07	4.82713e+08	0.150702	24h	3.37388e+07	2.44202e+07	5.8159e+07	0.723802					48h	1.78528	0.766032	0.122982	4.84141	0.0688982	0.0854769	0.0215046	0.791374
48h	1.53406e+08	2.73873e+08	4.27279e+08	1.78528	48h	2.21652e+08	1.69793e+08	3.91445e+08	0.766032	48h	3.16688e+08	3.89467e+07	3.55634e+08	0.122982	48h	3.67088e+07	1.77722e+08	2.14431e+08	4.84141					72h	32.4031	30.0597	2.29861	10.8739	0.150749	0.234071	0.0253647	0.915011
72h	4.15398e+06	1.34602e+08	1.38756e+08	32.4031	72h	1.05525e+07	3.17204e+08	3.27757e+08	30.0597	72h	1.65513e+07	3.8045e+07	5.45963e+07	2.29861	72h	1.33501e+07	1.45168e+08	1.58518e+08	10.8739					96h	270.86	136.313	69.4152	89.708	0.290048	2.92771	0.0265294	12.1155
96h	641422	1.73736e+08	1.74377e+08	270.86	96h	2.60018e+06	3.54437e+08	3.57038e+08	136.313	96h	1.23452e+06	8.56943e+07	8.69289e+07	69.4152	96h	2.45283e+06	2.20038e+08	2.22491e+08	89.708					120h	748.646	142.588	984.307	82.5105	0.26428	0.420353	13.0527	61.7098
120h	126656	9.48208e+07	9.49474e+07	748.646	120h	1.16804e+06	1.66548e+08	1.67716e+08	142.588	120h	52023	5.12065e+07	5.12586e+07	984.307	120h	1.21814e+06	1.00509e+08	1.01727e+08	82.5105					144h	10328.1	2970.84	2536.29	254.489	7.38854	0.637541	0.359226	247.898
144h	10102.7	1.04342e+08	1.04352e+08	10328.1	144h	76592.5	2.27544e+08	2.27621e+08	2970.84	144h	16670.4	4.22809e+07	4.22976e+07	2536.29	144h	523254	1.33162e+08	1.33685e+08	254.489
IEC
BeWo					BeWo fork					HTR-8					HuH-7
Time-point	Intracellular	Extracellular	Total	Relation	Time-point	Intracellular	Extracellular	Total	Relation	Time-point	Intracellular	Extracellular	Total	Relation	Time-point	Intracellular	Extracellular	Total	Relation
2h	173553	1349.73	174902	0.00777708	2h	116591	252805	369395	2.1683	2h	212390	1992.49	214383	0.00938127	2h	26832.6	95293.1	122126	3.55139
24h	270601	9762	280363	0.0360753	24h	2.90329e+06	257998	3.16129e+06	0.0888638	24h	482447	3812.72	486260	0.00790288	24h	434274	196473	630746	0.452417
48h	1.02494e+06	70616.9	1.09556e+06	0.0688982	48h	5.77917e+06	493985	6.27315e+06	0.0854769	48h	545929	11740	557669	0.0215046	48h	1.70705e+06	1.35091e+06	3.05796e+06	0.791374
72h	676473	101978	778450	0.150749	72h	1.34193e+06	314107	1.65604e+06	0.234071	72h	558379	14163.1	572542	0.0253647	72h	1.28547e+06	1.17622e+06	2.46168e+06	0.915011
96h	835779	242416	1.0782e+06	0.290048	96h	135779	397522	533302	2.92771	96h	617635	16385.5	634020	0.0265294	96h	239541	2.90217e+06	3.14171e+06	12.1155
120h	893319	236086	1.12941e+06	0.26428	120h	368080	154724	522804	0.420353	120h	46589.5	608119	654708	13.0527	120h	26590.2	1.64088e+06	1.66747e+06	61.7098
144h	547303	4.04377e+06	4.59107e+06	7.38854	144h	286453	182625	469078	0.637541	144h	237311	85248	322559	0.359226	144h	9617.27	2.3841e+06	2.39371e+06	247.898

## Sheet: New_Tables_Graph_IEC_MR766bp
IEC
BeWo					BeWo_fork					HTR8					HuH-7
Time-point	Intracellular	Extracellular	Total		Time-point	Intracellular	Extracellular	Total		Time-point	Intracellular	Extracellular	Total		Time-point	Intracellular	Extracellular	Total
2h	173553	1349.73	174902		2h	116591	252805	116591		2h	212390	1992.49	212390		2h	26832.6	95293.1	26832.6
24h	270601	9762	280363		24h	2.90329e+06	257998	2.90329e+06		24h	482447	3812.72	482447		24h	434274	196473	434274
48h	1.02494e+06	70616.9	1.09556e+06		48h	5.77917e+06	493985	5.77917e+06		48h	545929	11740	545929		48h	1.70705e+06	1.35091e+06	1.70705e+06
72h	676473	101978	778450		72h	1.34193e+06	314107	1.34193e+06		72h	558379	14163.1	558379		72h	1.28547e+06	1.17622e+06	1.28547e+06
96h	835779	242416	1.0782e+06		96h	135779	397522	135779		96h	617635	16385.5	617635		96h	239541	2.90217e+06	239541
120h	893319	236086	1.12941e+06		120h	368080	154724	368080		120h	46589.5	608119	46589.5		120h	26590.2	1.64088e+06	26590.2
144h	547303	4.04377e+06	4.59407e+06		144h	286453	182625	286453		144h	237311	85248	237311		144h	9617.27	2.3841e+06	9617.27
MR766bp
BeWo					BeWo_fork					HTR8					HuH-7
Time-point	Intracellular	Extracellular	Total		Time-point	Intracellular	Extracellular	Total		Time-point	Intracellular	Extracellular	Total		Time-point	Intracellular	Extracellular	Total
2h	3.15437e+07	2.90118e+07	6.05555e+07		2h	2.01439e+07	3.82525e+07	2.01439e+07		2h	2.76847e+07	2.90088e+07	2.76847e+07		2h	2.47142e+06	3.3468e+07	2.47142e+06
24h	7.54074e+08	1.02275e+08	8.5635e+08		24h	7.17636e+08	1.26437e+08	7.17636e+08		24h	4.19495e+08	6.32185e+07	4.19495e+08		24h	3.37388e+07	2.44202e+07	3.37388e+07
48h	1.53406e+08	2.73873e+08	4.27279e+08		48h	2.21652e+08	1.69793e+08	2.21652e+08		48h	3.16688e+08	3.89467e+07	3.16688e+08		48h	3.67088e+07	1.77722e+08	3.67088e+07
72h	4.15398e+06	1.34602e+08	1.38756e+08		72h	1.05525e+07	3.17204e+08	1.05525e+07		72h	1.65513e+07	3.8045e+07	1.65513e+07		72h	1.33501e+07	1.45168e+08	1.33501e+07
96h	641422	1.73736e+08	1.74377e+08		96h	2.60018e+06	3.54437e+08	2.60018e+06		96h	1.23452e+06	8.56943e+07	1.23452e+06		96h	2.45283e+06	2.20038e+08	2.45283e+06
120h	126656	9.48208e+07	9.49474e+07		120h	1.16804e+06	1.66548e+08	1.16804e+06		120h	52023	5.12065e+07	52023		120h	1.21814e+06	1.00509e+08	1.21814e+06
144h	10102.7	1.04342e+08	1.04352e+08		144h	76592.5	2.27544e+08	76592.5		144h	16670.4	4.22809e+07	16670.4		144h	523254	1.33162e+08	523254

## Sheet: Average triplacate_ 24-48-72h
HuH-7/MR766lp																Média Ct		Media PFU/mL
Time-point	First	Second	Third	Mean	Standard deviation	Coefficient of variation	PFU/mL 1st	PFU/mL 2nd	PFU/mL 3rd	Mean PFU/mL	Standard deviation	Coefficient of variation	Log10 PFU/mL			Extra	Intra	Extra	Intra
24h (ex)	18.6652	18.5847	15.7531	18.5847	1.65856	8.9243	2.44202e+07	2.58037e+07	1.79156e+08	2.58037e+07	8.89402e+07	344.679	7.41168		24h	18.5847	14.7323	2.58037e+07	3.60259e+08
48h (ex)	15.7649	13.474	11.3189	13.474	2.22331	16.5007	1.77722e+08	8.52271e+08	3.72452e+09	8.52271e+08	1.88346e+09	220.993	8.93058		48h	13.474	18.0696	8.52271e+08	3.67088e+07
72h (ex)	16.0605	12.9128	13.8946	13.8946	1.61057	11.5913	1.45168e+08	1.25137e+09	6.39118e+08	6.39118e+08	5.54155e+08	86.7062	8.80558		72h	13.8946	17.9837	6.39118e+08	3.89308e+07
24h (in)	18.1929	14.7323	11.749	14.7323	3.22487	21.8898	3.37388e+07	3.60259e+08	2.77488e+09	3.60259e+08	1.49727e+09	415.609	8.55661
48h (in)	18.0696	20.4419	15.2984	18.0696	2.57433	14.2467	3.67088e+07	7.23971e+06	2.44551e+08	3.67088e+07	1.29347e+08	352.359	7.56477
72h (in)	19.5477	12.3974	17.9837	17.9837	3.75901	20.9023	1.33501e+07	1.7806e+09	3.89308e+07	3.89308e+07	1.01302e+09	2602.09	7.59029
HuH-7/IEC
Time-point	First	Second	Third	Mean	Standard deviation	Coefficient of variation	PFU/mL 1st	PFU/mL 2nd	PFU/mL 3rd	Mean PFU/mL	Standard deviation	Coefficient of variation	Log10 PFU/mL			Extra	Intra	Extra	Intra
24h (ex)	19.1876	19.155	18.427	19.155	0.429998	2.24483	196473	201028	335637	201028	79064.2	39.33	5.30326		24h	19.155	13.2423	201028	1.29231e+07
48h (ex)	16.4494	17.0087	15.9089	16.4494	0.549904	3.343	1.35091e+06	911173	1.97654e+06	1.35091e+06	535380	39.631	6.13063		48h	16.4494	11.3148	1.35091e+06	5.0212e+07
72h (ex)	16.6461	13.2743	14.6527	14.6527	1.69521	11.5693	1.17622e+06	1.26349e+07	4.78713e+06	4.78713e+06	5.85843e+06	122.379	6.68008		72h	14.6527	11.4773	4.78713e+06	4.47806e+07
24h (in)	18.0611	11.5281	13.2423	13.2423	3.38724	25.5789	434274	4.3208e+07	1.29231e+07	1.29231e+07	2.19952e+07	170.2	7.11137
48h (in)	16.1171	9.44658	11.3148	11.3148	3.44114	30.4129	1.70705e+06	1.87109e+08	5.0212e+07	5.0212e+07	9.61486e+07	191.485	7.70081
72h (in)	16.5199	11.3009	11.4773	11.4773	2.96361	25.8214	1.28547e+06	5.07055e+07	4.47806e+07	4.47806e+07	2.69854e+07	60.2614	7.65109
HTR-8/MR766lp
Time-point	First	Second	Third	Mean	Standard deviation	Coefficient of variation	PFU/mL 1st	PFU/mL 2nd	PFU/mL 3rd	Mean PFU/mL	Standard deviation	Coefficient of variation	Log10 PFU/mL			Extra	Intra	Extra	Intra
24h (ex)	17.2753	26.7668	21.1752	21.1752	4.7708	22.5301	6.32185e+07	95494.8	4.38326e+06	4.38326e+06	3.52716e+07	804.687	6.6418		24h	21.1752	16.1187	4.38326e+06	1.39501e+08
48h (ex)	17.9831	23.264	15.6052	17.9831	3.92006	21.7985	3.89467e+07	1.0495e+06	1.98245e+08	3.89467e+07	1.04641e+08	268.677	7.59047		48h	17.9831	14.9207	3.89467e+07	3.16688e+08
72h (ex)	18.0174	16.958	14.3511	16.958	1.88678	11.1262	3.8045e+07	7.85497e+07	4.67641e+08	7.85497e+07	2.37201e+08	301.975	7.89514		72h	16.958	14.94	7.85497e+07	3.12539e+08
24h (in)	14.5099	20.3754	16.1187	16.1187	3.03074	18.8026	4.19495e+08	7.57689e+06	1.39501e+08	1.39501e+08	2.10348e+08	150.785	8.14458
48h (in)	14.9207	17.4349	12.4152	14.9207	2.50985	16.8213	3.16688e+08	5.6677e+07	1.75899e+09	3.16688e+08	9.17034e+08	289.57	8.50063
72h (in)	19.2336	14.94	13.7882	14.94	2.86978	19.2088	1.65513e+07	3.12539e+08	6.87378e+08	3.12539e+08	3.36185e+08	107.566	8.4949
HTR-8/IEC
Time-point	First	Second	Third	Mean	Standard deviation	Coefficient of variation	PFU/mL 1st	PFU/mL 2nd	PFU/mL 3rd	Mean PFU/mL	Standard deviation	Coefficient of variation	Log10 PFU/mL			Extra	Intra	Extra	Intra
24h (ex)	24.7862	20.4066	21.4856	21.4856	2.28177	10.62	3812.72	83273.8	38955.5	38955.5	39818.8	102.216	4.59057		24h	21.4856	15.2519	38955.5	3.13917e+06
48h (ex)	23.189	19.9702	20.3138	20.3138	1.76756	8.70131	11740	113235	88901	88901	52989.4	59.605	4.94891		48h	20.3138	15.4676	88901	2.69689e+06
72h (ex)	22.9225	20.0666	18.5712	20.0666	2.21081	11.0174	14163.1	105800	303239	105800	147730	139.631	5.02449		72h	20.0666	13.8981	105800	8.14378e+06
24h (in)	17.9117	12.9935	15.2519	15.2519	2.46183	16.1411	482447	1.53969e+07	3.13917e+06	3.13917e+06	7.95562e+06	253.431	6.49681
48h (in)	17.7362	12.9247	15.4676	15.4676	2.40705	15.5619	545929	1.61619e+07	2.69689e+06	2.69689e+06	8.46358e+06	313.827	6.43086
72h (in)	17.7042	12.483	13.8981	13.8981	2.70026	19.429	558379	2.20569e+07	8.14378e+06	8.14378e+06	1.09033e+07	133.886	6.91083
BeWo/MR766lp
Time-point	First	Second	Third	Mean	Standard deviation	Coefficient of variation	PFU/mL 1st	PFU/mL 2nd	PFU/mL 3rd	Mean PFU/mL	Standard deviation	Coefficient of variation	Log10 PFU/mL			Extra	Intra	Extra	Intra
24h (ex)	16.5723	19.6615	16.0467	16.5723	1.95305	11.785	1.02275e+08	1.23499e+07	8.09223e+07	8.09223e+07	4.69835e+07	58.0601	7.90807		24h	16.5723	13.2968	8.09223e+07	7.54074e+08
48h (ex)	15.1329	12.79	14.1859	14.1859	1.17864	8.30853	2.73873e+08	1.36108e+09	2.56978e+08	2.73873e+08	6.32635e+08	230.996	8.43755		48h	14.1859	13.2699	2.73873e+08	1.54658e+09
72h (ex)	16.171	11.4774	11.5424	11.5424	2.69124	23.316	1.34602e+08	3.34169e+09	2.01514e+09	2.01514e+09	1.6115e+09	79.9694	9.30431		72h	11.5424	11.8709	2.01514e+09	4.22649e+09
24h (in)	13.6529	13.2968	12.4254	13.2968	0.631511	4.74935	7.54074e+08	9.62181e+08	6.55997e+08	7.54074e+08	1.56352e+08	20.7343	8.87741
48h (in)	15.9799	11.4119	13.2699	13.2699	2.29721	17.3114	1.53406e+08	3.49508e+09	1.54658e+09	1.54658e+09	1.67851e+09	108.53	9.18937
72h (in)	21.2537	11.1342	11.8709	11.8709	5.64187	47.5271	4.15398e+06	4.22649e+09	6.18944e+09	4.22649e+09	3.16067e+09	74.7824	9.62598
BeWo/IEC
Time-point	First	Second	Third	Mean	Standard deviation	Coefficient of variation	PFU/mL 1st	PFU/mL 2nd	PFU/mL 3rd	Mean PFU/mL	Standard deviation	Coefficient of variation	Log10 PFU/mL			Extra	Intra	Extra	Intra
24h (ex)	23.451	20.2864	17.4352	20.2864	3.00928	14.834	9762	90632.5	674810	90632.5	362880	400.386	4.95728		24h	20.2864	12.8541	90632.5	1.69857e+07
48h (ex)	20.6408	18.9226	19.1613	19.1613	0.930769	4.85756	70616.9	236766	200146	200146	87296.8	43.6166	5.30135		48h	19.1613	14.1573	200146	6.78508e+06
72h (ex)	20.1189	17.2326	16.3011	17.2326	1.99056	11.5511	101978	778258	1.49964e+06	778258	698955	89.8102	5.89112		72h	17.2326	14.4342	778258	5.58322e+06
24h (in)	18.7329	12.6397	12.8541	12.8541	3.4577	26.8996	270601	1.97531e+07	1.69857e+07	1.69857e+07	1.05405e+07	62.0554	7.23008
48h (in)	16.8416	14.1573	14.1546	14.1573	1.55054	10.9522	1.02494e+06	6.78508e+06	6.79783e+06	6.78508e+06	3.3293e+06	49.068	6.83155
72h (in)	17.4317	13.9307	14.4342	14.4342	1.89277	13.1131	676473	7.95895e+06	5.58322e+06	5.58322e+06	3.71382e+06	66.5175	6.74688
B+F/MR766lp
Time-point	First	Second	Third	Mean	Standard deviation	Coefficient of variation	PFU/mL 1st	PFU/mL 2nd	PFU/mL 3rd	Mean PFU/mL	Standard deviation	Coefficient of variation	Log10 PFU/mL			Extra	Intra	Extra	Intra
24h (ex)	16.2624	18.9798	16.9145	16.9145	1.41861	8.38693	1.26437e+08	1.96911e+07	8.09223e+07	8.09223e+07	5.35653e+07	66.1935	7.90807		24h	16.9145	13.8565	8.09223e+07	6.55997e+08
48h (ex)	15.8316	13.3692	15.226	15.226	1.28306	8.42677	1.69793e+08	9.15645e+08	2.56978e+08	2.56978e+08	4.07786e+08	158.685	8.4099		48h	15.226	12.6033	2.56978e+08	1.54658e+09
72h (ex)	14.9183	11.7028	12.2165	12.2165	1.72737	14.1396	3.17204e+08	2.86404e+09	2.01514e+09	2.01514e+09	1.29679e+09	64.3523	9.30431		72h	12.2165	12.8138	2.01514e+09	1.33901e+09
24h (in)	13.7253	14.9323	13.8565	13.8565	0.662246	4.77931	7.17636e+08	3.1418e+08	6.55997e+08	6.55997e+08	2.17338e+08	33.1309	8.8169
48h (in)	15.4421	11.9696	12.6033	12.6033	1.84927	14.673	2.21652e+08	2.38618e+09	1.54658e+09	1.54658e+09	1.09129e+09	70.5618	9.18937
72h (in)	19.8913	12.8138	10.5767	12.8138	4.86239	37.9464	1.05525e+07	1.33901e+09	6.18944e+09	1.33901e+09	3.25244e+09	242.898	9.12678
B+F/IEC
Time-point	First	Second	Third	Mean	Standard deviation	Coefficient of variation	PFU/mL 1st	PFU/mL 2nd	PFU/mL 3rd	Mean PFU/mL	Standard deviation	Coefficient of variation	Log10 PFU/mL			Extra	Intra	Extra	Intra
24h (ex)	18.8007	20.2995	18.1931	18.8007	1.08416	5.76662	257998	89799.6	395736	257998	153221	59.3885	5.41162		24h	18.8007	15.3629	257998	2.90329e+06
48h (ex)	17.8782	19.138	17.0062	17.8782	1.07175	5.99473	493985	203456	912782	493985	356591	72.1865	5.69371		48h	17.8782	14.3852	493985	5.77917e+06
72h (ex)	18.5212	17.321	17.019	17.321	0.794611	4.58757	314107	731324	904603	731324	303529	41.5041	5.86411		72h	17.321	15.8421	731324	2.07186e+06
24h (in)	15.3629	15.6409	11.9109	15.3629	2.07793	13.5257	2.90329e+06	2.38709e+06	3.30001e+07	2.90329e+06	1.75273e+07	603.704	6.46289
48h (in)	14.3852	15.0195	13.2653	14.3852	0.888244	6.17471	5.77917e+06	3.69748e+06	1.27159e+07	5.77917e+06	4.72197e+06	81.7069	6.76187
72h (in)	16.4589	15.8421	13.1424	15.8421	1.76389	11.1342	1.34193e+06	2.07186e+06	1.38649e+07	2.07186e+06	7.02893e+06	339.258	6.31636
